# Supplementary material for: Minimally Invasive Parafascicular Surgery (MIPS) for Spontaneous Intracerebral Hemorrhage Compared to Medical Management: A Case Series Comparison for a Single Institution
Source: Hindawi journal article supplement (doi:10.1155/2020/6503038), 2020-06-13
Supplement: f1 [file 6503038.f1.pdf]

Supplement 1: Logistic Regression Results for Inpatient Infection and Favorable Discharge Status

**Supplement Table 1: Logistic Regression Results for Inpatient Infection**

| Variable                             | Odds Ratio | 95% CI        | P-value |
|--------------------------------------|------------|---------------|---------|
| Treatment Group (1 = MIPS)           | 1.25       | (0.35 - 4.46) | 0.729   |
| Having a Lobar Stroke                | 0.98       | (0.29 - 3.38) | 0.977   |
| Intracerebral Hemorrhage Scare Score | 1.12       | (0.55 - 2.26) | 0.757   |
| Having been on a ventilator          | 0.62       | (0.15 - 2.55) | 0.510   |

**Supplement Table 2: Logistic Regression for Favorable Discharge Status**

| Variable                             | Odds Ratio | 95% CI             | P-value |
|--------------------------------------|------------|--------------------|---------|
| Treatment Group (1 = MIPS)           | 1.77       | (0.168 - 21.992)   | 0.019   |
| Having a Lobar Stroke                | -0.59      | (-2.339 - 0.895)   | 0.497   |
| Intracerebral Hemorrhage Scare Score | -0.43      | (-19.328 - 1.966)  | 0.379   |
| Having been on a ventilator          | -3.34      | (-41.318 - -1.754) | 0.001   |
